# Supplementary material for: Microplasma-printed Au-based SERS sensing platform for ultra-sensitive chemical analyte detection
Source: Royal Society of Chemistry journal article supplement (doi:10.1039/d4re00011k), 2024-01-01
Supplement: d4re00011k2.pdf [file d4re00011k2.pdf]

*Supporting information for:*

## **Microplasma-printed Au-based SERS sensing platform for ultra-sensitive chemical analyte detection**

Ziyi Zhang,<sup>a</sup> Fajun Wang,<sup>a</sup> Volker Hessel,<sup>b</sup> Kostya (Ken) Ostrikov,<sup>c</sup> Wei Wang,<sup>d</sup> Xu Zhang,<sup>d</sup> and Liangliang Lin <sup>\*a</sup>

<sup>a</sup> Key Laboratory of Synthetic and Biological Colloids, Ministry of Education, School of Chemical and Material Engineering, Jiangnan University, Wuxi 214122, China.

<sup>b</sup> School of Chemical Engineering and Advanced Materials, The University of Adelaide, North Terrace Campus, Adelaide 5005, Australia.

<sup>c</sup> School of Chemistry and Physics and QUT Centre for Materials Science, Queensland University of Technology (QUT), Brisbane, QLD 4000, Australia.

<sup>d</sup> Harbin Fuerjia Technology Co., LTD., Heilongjiang Harbin 150000, China.

E-mail: [linliangliang@jiangnan.edu.cn](mailto:linliangliang@jiangnan.edu.cn) (+86-13735820390)

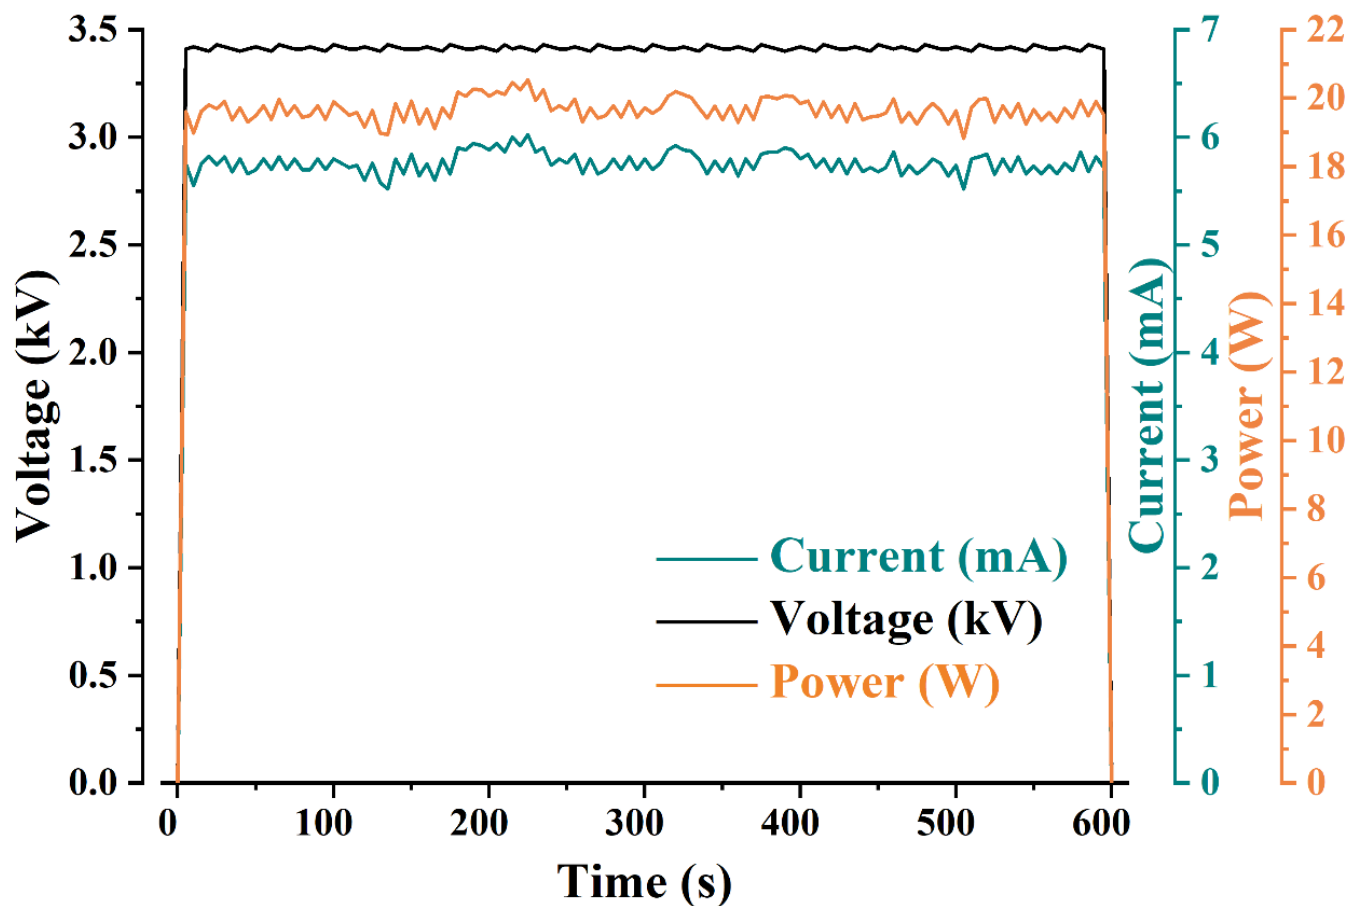

**Fig. S1** Temporal dynamics of voltage (V) and current (I) characteristics during the microplasma-assisted fabrication of the Au-based platforms.

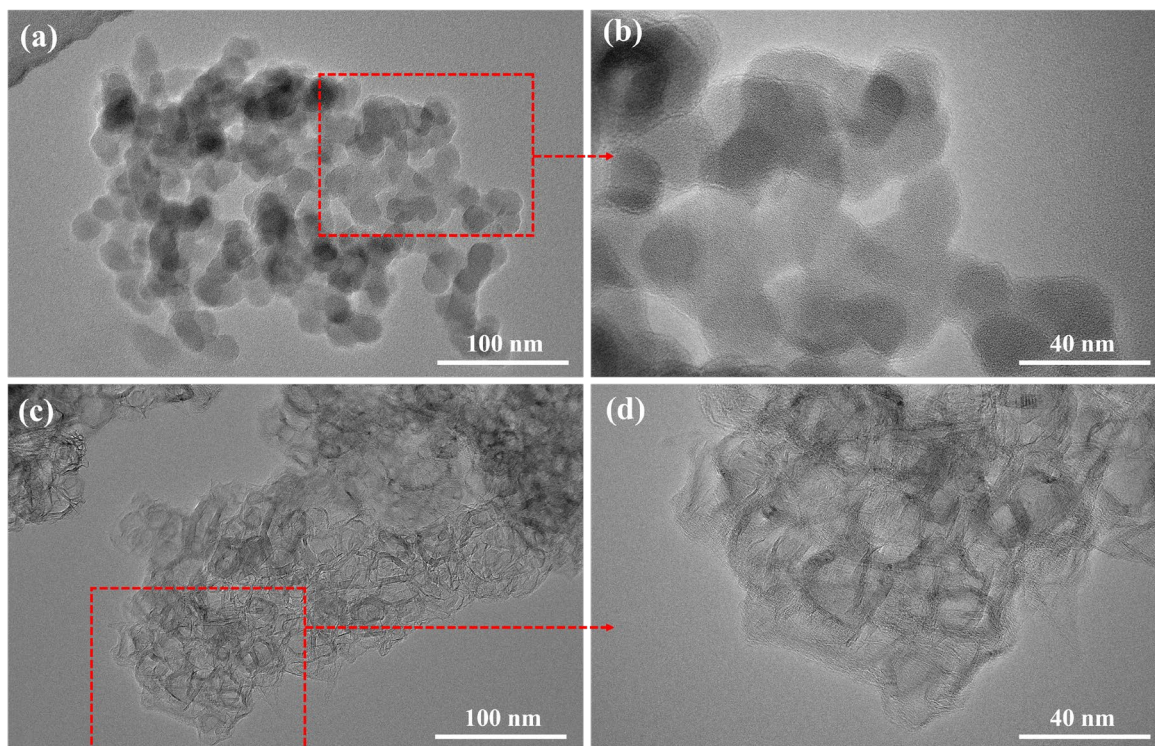

**Fig. S2** Salient TEM images of the original SiO<sub>2</sub> particles before plasma processing: (a, b) SiO<sub>2</sub>-25; (c, d) SiO<sub>2</sub>-50.

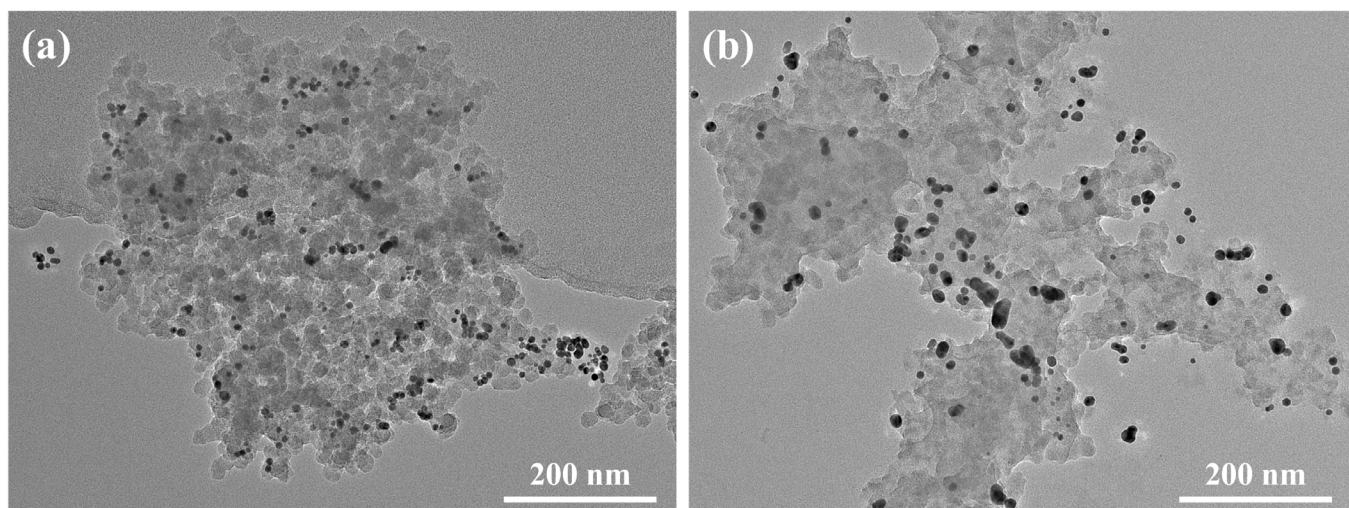

**Fig. S3** TEM images of (a) Au/SiO<sub>2</sub>-25 nanoparticles prepared at conditions 2; (b) Au/SiO<sub>2</sub>-50 nanoparticles prepared at conditions 3.

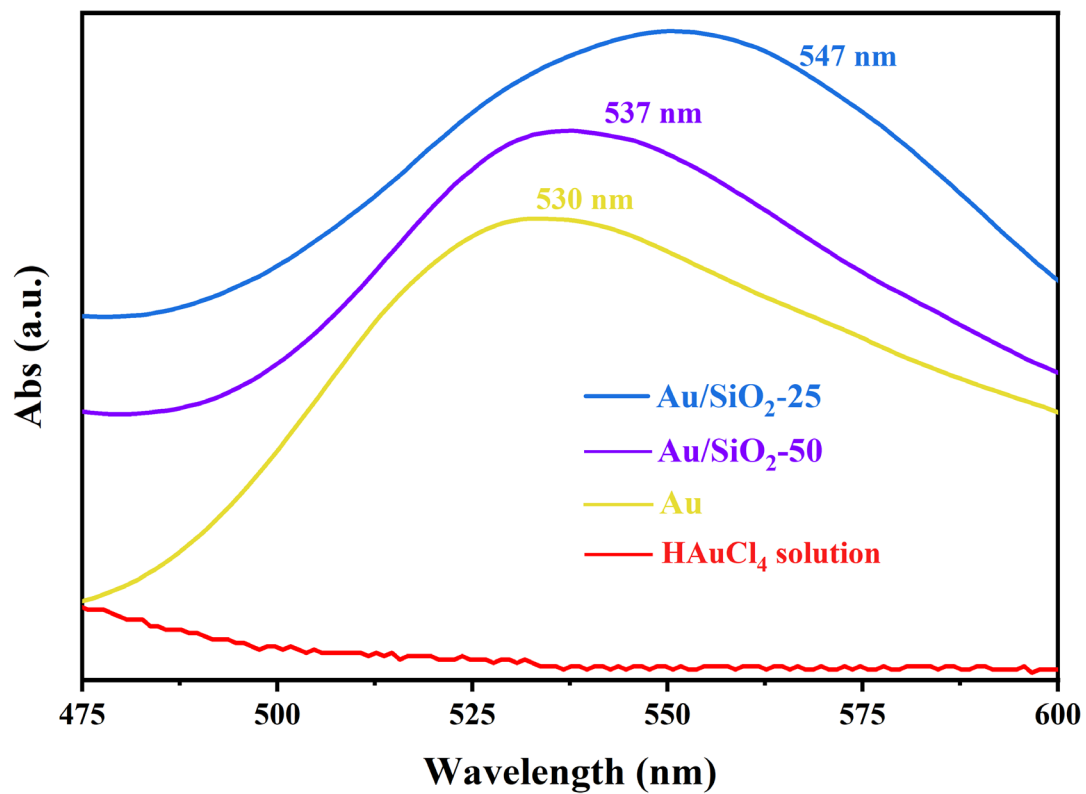

**Fig. S4** UV-Vis absorption spectra of the HAuCl<sub>4</sub> solution as well as AuNPs and Au/SiO<sub>2</sub> nanoparticles prepared at conditions 1-3.

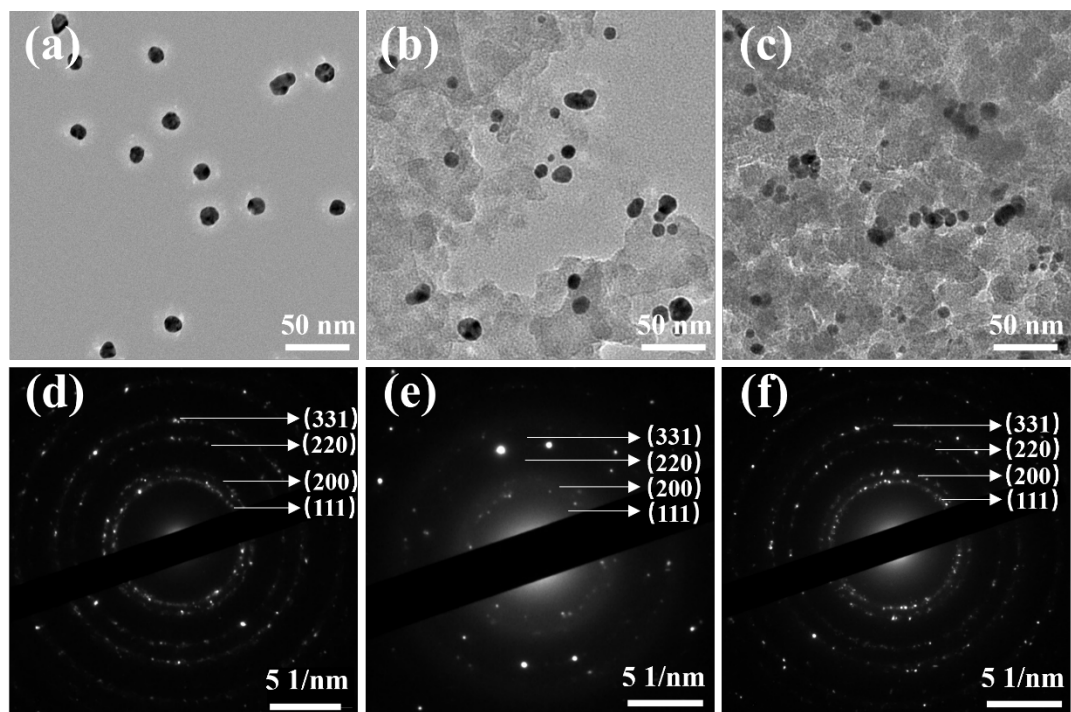

**Fig. S5** (a-c) TEM images of the Au-based nanoparticles obtained at conditions 4-6: (a) AuNPs; (b) Au/SiO<sub>2</sub>-25 nm, (c) Au/SiO<sub>2</sub>-50 nm. (d-f) The relevant SAED images.

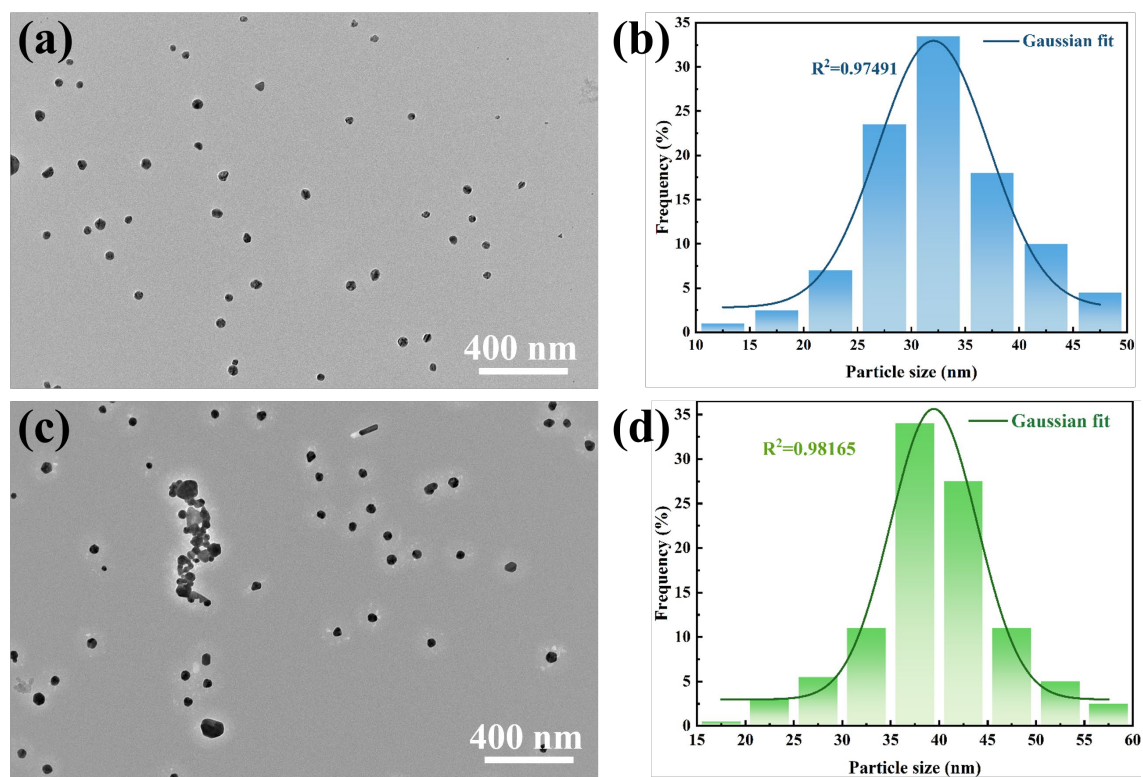

**Fig. S6** TEM images and size distribution diagrams of the AuNPs prepared at plasma power of: (a, b) 10 W; (c, d) 20 W.

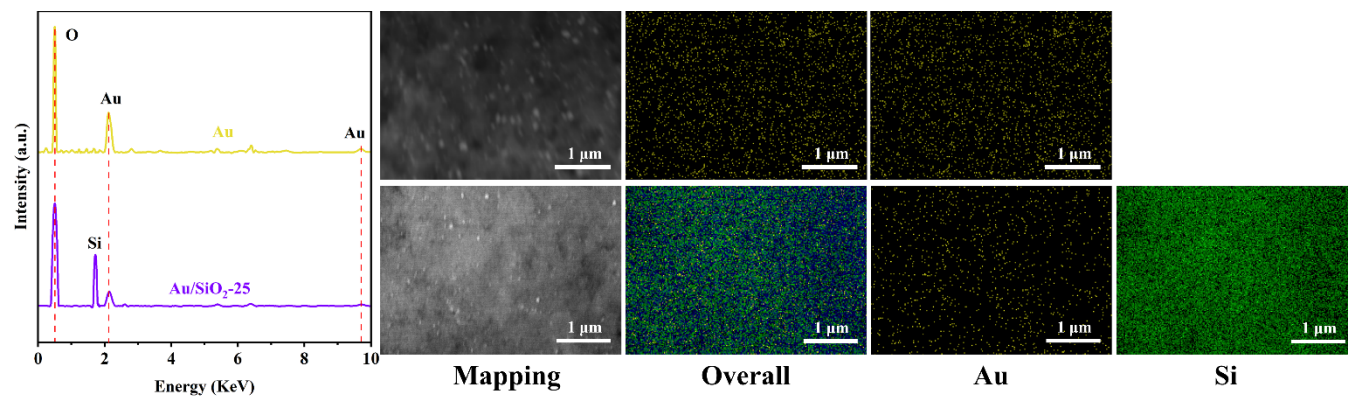

**Fig. S7** EDX spectra and elemental distribution of the microplasma-fabricated AuNPs-platform and Au/SiO<sub>2</sub>-25 platform.



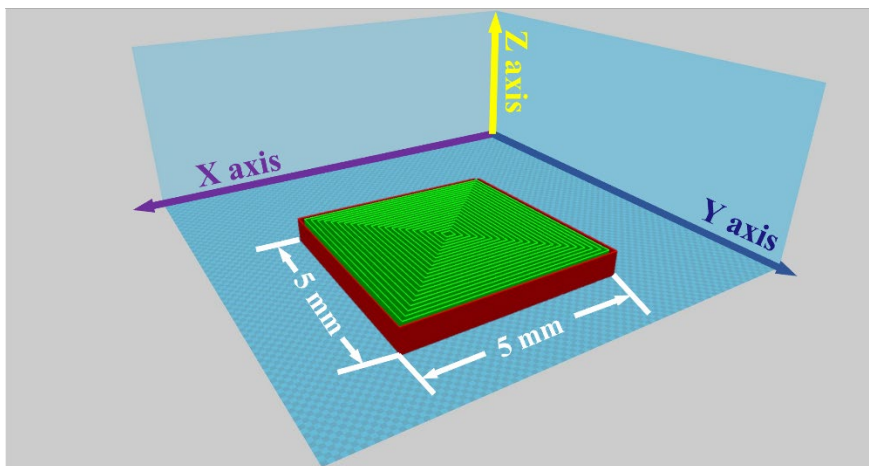

**Fig. S8** The designed model for the microplasma printing of the AuNPs and Au/SiO<sub>2</sub> platforms.

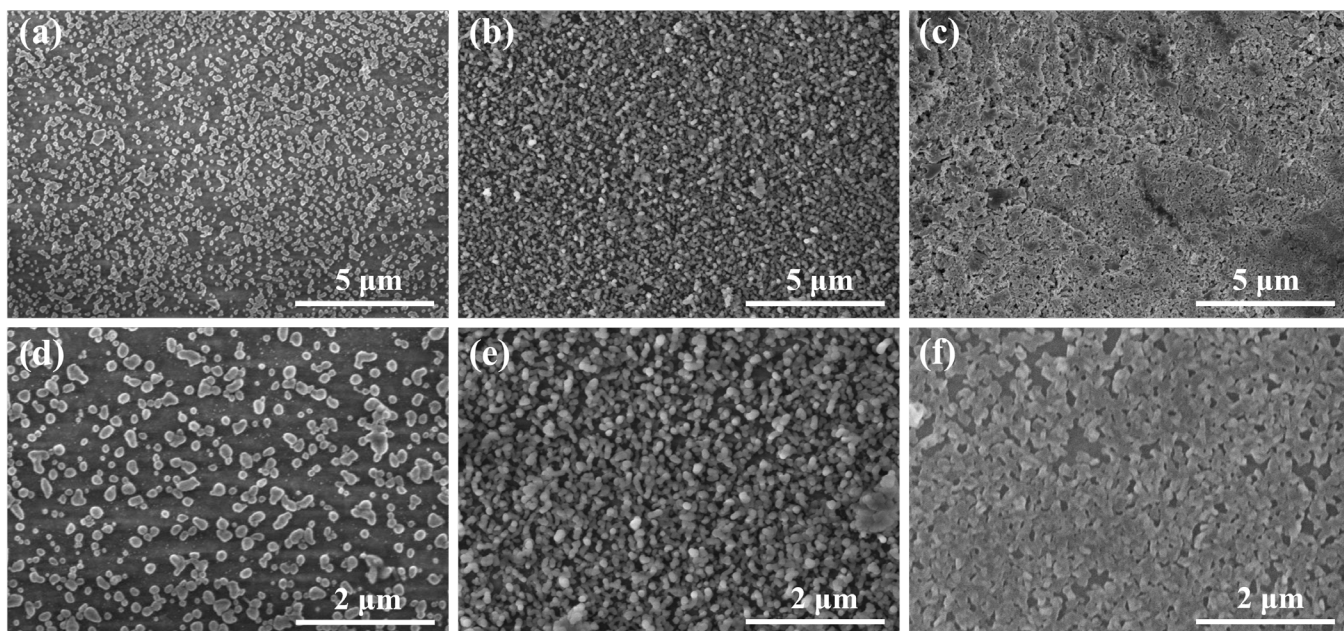

**Fig. S9** (a-c) low magnitude SEM images of Au-based SERS platforms fabricated at condition 1-3: (a) AuNPs, (b) Au/SiO<sub>2</sub>-25, and (c) Au/SiO<sub>2</sub>-50 platform. (d-f) The corresponding high magnitude SEM images.

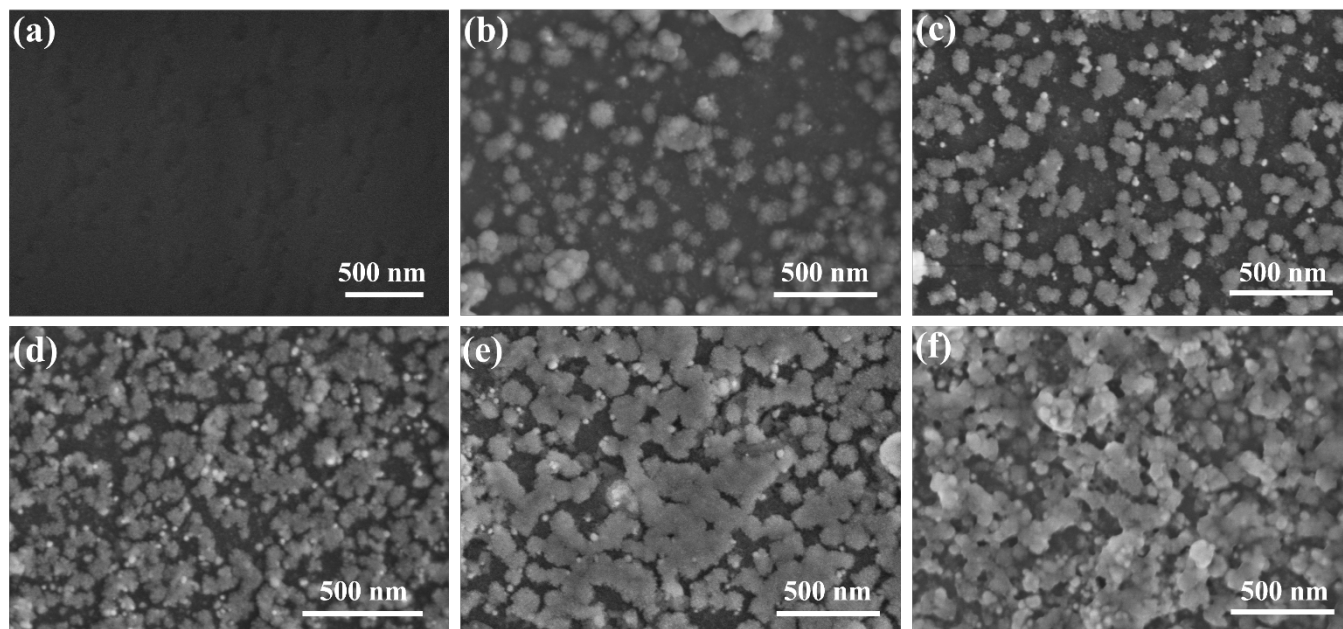

**Fig. S10** SEM images of (a) the bare silicon wafer as well as the Au/SiO<sub>2</sub> platforms fabricated at different conditions: (b) condition 8; (c) condition 9; (d) condition 10; (e) condition 11; (f) condition 2.

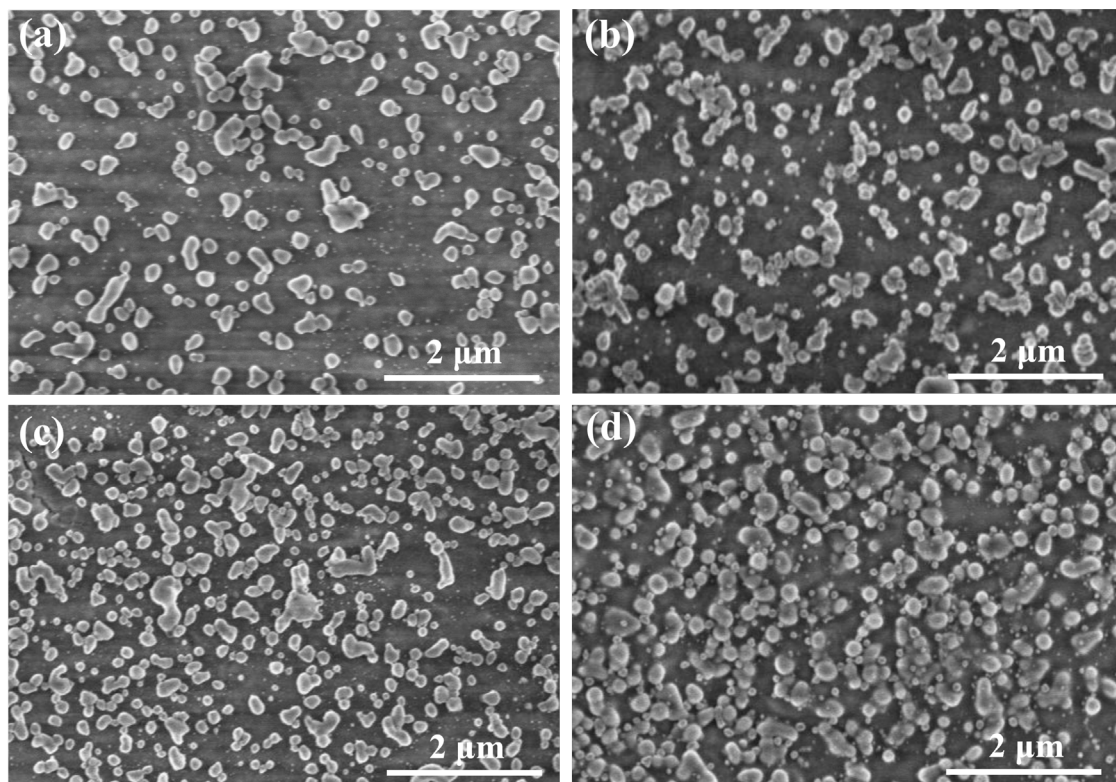

**Fig. S11** SEM images of the AuNPs platforms fabricated at different  $\text{HAuCl}_4$  concentrations: (a) 0.1 mM; (b) 0.5 mM; (c) 1.0 mM; (d) 1.5 mM.

**Table S1** Operation parameters of the 3D printer for the fabrication of the SERS platforms.

| Operation parameter          | Value            |
|------------------------------|------------------|
| Speed of the electrode       | 20 mm/s          |
| X-axis accuracy              | 0.0011 mm        |
| Y-axis accuracy              | 0.0011 mm        |
| Z-axis accuracy              | 0.00125 mm       |
| X-axis width of the platform | 5 mm             |
| Y-axis width of the platform | 5 mm             |
| Operation temperature        | Room temperature |
| Pressure                     | Normal pressure  |
